# Supplementary material for: Questionnaire on the Care Needs of Primary Caregivers of Premature Infants at Home: A Tool Development and Validation Study Based on the KANO Model
Source: Research Square preprint supplement (doi:10.21203/rs.3.rs-7645691/v1), 2025-10-14
Supplement: Supplementary file 1 [file 75e8729bd91d28e6e1f296f1.docx]

English Translation of the Semi-structured Interview Guide

This document is an English translation of the interview guide that was originally published in Chinese. This guide was used in the current manuscript to gather qualitative data for the development of the care needs questionnaire."

**interview guide**

1. What are your care experiences and feelings during daily baby care?
2. From which channels did you acquire existing knowledge and skills related to premature infant care?
3. What difficulties have you encountered during daily baby care? How did you resolve these difficulties?
4. What support and help have you received during home care (from family, hospital, society)? Through what channels?
5. What changes have caring for the baby at home brought to your life (role changes, life values)?
6. Are you willing to participate in premature infant care skill training and share care experiences? How would you prefer to participate?
7. What unmet care needs do you have at this stage? What do you think are the reasons?
8. Do you have any additions regarding the discussed questions?
