# Supplementary material for: Questionnaire on the Care Needs of Primary Caregivers of Premature Infants at Home: A Tool Development and Validation Study Based on the KANO Model
Source: Research Square preprint supplement (doi:10.21203/rs.3.rs-7645691/v1), 2025-10-14
Supplement: Supplementary file 2 [file ad30a6f11eccaa459493a936.docx]

**Questionnaire on the Care Needs of Primary Caregivers of Premature Infants at Home**

**（Final version）**

| ****Care Needs Items for Primary Caregivers of Premature Infants at Home**** | ****Attribute Surve**** | | | | |
| --- | --- | --- | --- | --- | --- |
| ****Satisfied**** | ****It should be that way**** | ****Neutral**** | ****Acceptable**** | ****Dissatisfied**** |
| ****1a.**** If informed about the timing and methods for transitioning between milk types (specialized formula, standard formula, breast milk), how do you feel? ****1b.**** If ****not**** informed about the timing and methods for transitioning between milk types (specialized formula, standard formula, breast milk), how do you feel? |  |  |  |  |  |
| ****2a.**** If instructed on medication usage methods and related precautions, how do you feel? ****2b.**** If ****not**** instructed on medication usage methods and related precautions, how do you feel? |  |  |  |  |  |
| ****3a.**** If informed about knowledge related to growth and development patterns, how do you feel? ****3b.**** If ****not**** informed about knowledge related to growth and development patterns, how do you feel? |  |  |  |  |  |
| ****4a.**** If informed about knowledge regarding normal bowel movements and urination, how do you feel? ****4b.**** If ****not**** informed about knowledge regarding normal bowel movements and urination, how do you feel? |  |  |  |  |  |
| ****5a.**** If guided on assessing feeding timing and amount, how do you feel? ****5b.**** If ****not**** guided on assessing feeding timing and amount, how do you feel? |  |  |  |  |  |
| ****6a.**** If guided on intellectual and nursing training for preterm infants (e.g., visual/auditory multi-sensory training, passive exercise), how do you feel? ****6b.**** If ****not**** guided on intellectual and nursing training for preterm infants (e.g., visual/auditory multi-sensory training, passive exercise), how do you feel? |  |  |  |  |  |
| ****7a.**** If guided on techniques to promote gas relief, how do you feel? ****7b.**** If ****not**** guided on techniques to promote gas relief, how do you feel? |  |  |  |  |  |
| ****8a.**** If guided on the care for infants discharged with oxygen tubes or other tubes, how do you feel? ****8b.**** If ****not**** guided on the care for infants discharged with oxygen tubes or other tubes, how do you feel? |  |  |  |  |  |
| ****9a.**** If guided on identifying abdominal distension, how do you feel? ****9b.**** If ****not**** guided on identifying abdominal distension, how do you feel? |  |  |  |  |  |
| ****10a.**** If guided on identifying and managing abnormal bowel movements (diarrhea, constipation), how do you feel? ****10b.**** If ****not**** guided on identifying and managing abnormal bowel movements (diarrhea, constipation), how do you feel? |  |  |  |  |  |
| ****11a.**** If guided on identifying abnormal jaundice, how do you feel? ****11b.**** If ****not**** guided on identifying abnormal jaundice, how do you feel? |  |  |  |  |  |
| ****12a.**** If guided on managing vomiting and choking during feeding, how do you feel? ****12b.**** If ****not**** guided on managing vomiting and choking during feeding, how do you feel? |  |  |  |  |  |
| ****13a.**** If guided on first aid for accidental falls from bed, how do you feel? ****13b.**** If ****not**** guided on first aid for accidental falls from bed, how do you feel? |  |  |  |  |  |
| ****14a.**** If guided on first aid for choking/asphyxiation, how do you feel? ****14b.**** If ****not**** guided on first aid for choking/asphyxiation, how do you feel? |  |  |  |  |  |
| ****15a.**** If guided on infant massage techniques, how do you feel? ****15b.**** If ****not**** guided on infant massage techniques, how do you feel? |  |  |  |  |  |
| ****16a.**** If guided on eye contact and vocal interaction techniques, how do you feel? ****16b.**** If ****not**** guided on eye contact and vocal interaction techniques, how do you feel? |  |  |  |  |  |
| ****17a.**** If the hospital provides diverse consultation methods (online consultation, offline accompaniment, special appointments, etc.), how do you feel? ****17b.**** If the hospital does ****not**** provide diverse consultation methods (online consultation, offline accompaniment, special appointments, etc.), how do you feel? |  |  |  |  |  |
| ****18a.**** If the hospital provides information on preterm infant diseases through various channels (lectures, public accounts, internet, etc.), how do you feel? ****18b.**** If the hospital does ****not**** provide information on preterm infant diseases through various channels (lectures, public accounts, internet, etc.), how do you feel? |  |  |  |  |  |
| ****19a.**** If the hospital conducts follow-ups for the preterm infant through various methods (outpatient follow-up, home visits, phone calls, etc.), how do you feel? ****19b.**** If the hospital does ****not**** conduct follow-ups for the preterm infant through various methods (outpatient follow-up, home visits, phone calls, etc.), how do you feel? |  |  |  |  |  |
| ****20a.**** If relevant institutions provide financial assistance and information on how to access it, how do you feel? ****20b.**** If relevant institutions do ****not**** provide financial assistance and information on how to access it, how do you feel? |  |  |  |  |  |
| ****21a.**** If able to obtain peer support (help from other caregivers of preterm infants), how do you feel? ****21b.**** If ****not**** able to obtain peer support (help from other caregivers of preterm infants), how do you feel? |  |  |  |  |  |
| ****22a.**** If able to obtain help from family members, how do you feel? ****22b.**** If ****not**** able to obtain help from family members, how do you feel? |  |  |  |  |  |
| ****23a.**** If able to make care decisions for the preterm infant jointly with family members, how do you feel? ****23b.**** If ****not**** able to make care decisions for the preterm infant jointly with family members, how do you feel? |  |  |  |  |  |
| ****24a.**** If able to maintain your own emotional stability during caregiving, how do you feel? ****24b.**** If ****not**** able to maintain your own emotional stability during caregiving, how do you feel? |  |  |  |  |  |
| ****25a.**** If able to care for the preterm infant independently, how do you feel? ****25b.**** If ****not**** able to care for the preterm infant independently, how do you feel? |  |  |  |  |  |
| ****26a.**** If able to participate in training classes to continuously improve preterm infant care skills, how do you feel? ****26b.**** If ****not**** able to participate in training classes to continuously improve preterm infant care skills, how do you feel? |  |  |  |  |  |
| ****27a.**** If provided with a platform for emotional and experience sharing, how do you feel? ****27b.**** If ****not**** provided with a platform for emotional and experience sharing, how do you feel? |  |  |  |  |  |
